# Supplementary material for: Urban areas promotes shifts in the proportion of prey consumed by four raptor species (Accipitridae) in Mexico
Source: PeerJ. 2025 Oct 29;13:e20307. doi: 10.7717/peerj.20307 (PMC12579481; doi:10.7717/peerj.20307)
Supplement: Supplemental Information 2 — The species of the prey, the taxonomic class when preys were vertebrates and in subphylum when preys were invertebrates, the information on the geographic location and the date on which the record occurred, the area type classification as well as the nearest distance to human settlements and the source of information (link to record of citizen science platform or the literature reference) are shown. The last four records, marked with an asterisk (*), were excluded from the analysis because they did not meet the inclusion criteria for this study. [file peerj-13-20307-s002.xlsx]

## Sheet: Hoja1
Supplemental Information 2. Raw data from records of prey consumed by studied raptors. The species of the prey, the taxonomic class when preys were vertebrates and in subphylum when preys were invertebrates, the information on the geographic location and the date on which the record occurred, the area type classification as well as the nearest distance to human settlements and the source of infor…
Prey species	Prey Class	Raptor species	Observation data		State (Mexico)	longitude (W)	latitude (N)	Area type	Nearest distance to human settlements (Km)	Source
			Month	Year
Rodentia	Mammalia	Buteo plagiatus	january	2020	Tamaulipas	-97.9336	22.4055	urban	0	https://www.naturalista.mx/observations/93941192
Iguanidae	Reptilia	Buteo plagiatus	september	2013	Oaxaca	-96.1529	15.7476	non-urban	1.46651	https://www.naturalista.mx/observations/1297889
Iguanidae	Reptilia	Buteo plagiatus	june	2014	Sinaloa	-106.443	23.2995	non-urban	1.09279	https://www.naturalista.mx/observations/734482
Iguanidae	Reptilia	Buteo plagiatus	june	2014	Sinaloa	-106.47	23.2596	non-urban	0.380271	https://www.naturalista.mx/observations/5473023
Bubulcus Ibis	Aves	Buteo plagiatus	september	2014	Veracruz	-96.708	20.1511	non-urban	6.92074	https://www.naturalista.mx/observations/3949382
Lacertidae	Reptilia	Buteo plagiatus	august	2017	Sinaloa	-106.443	23.299	non-urban	1.07149	https://www.naturalista.mx/observations/7443332
Rodentia	Mammalia	Buteo plagiatus	december	2017	Sinaloa	-106.457	23.28	urban	0	https://www.naturalista.mx/observations/67021664
Iguanidae	Reptilia	Buteo plagiatus	april	2018	Oaxaca	-96.1336	15.7693	non-urban	0.0470437	https://www.naturalista.mx/observations/10785961
Didelphis virginiana	Mammalia	Buteo plagiatus	may	2018	Tabasco	-93.2511	18.4331	non-urban	3.05034	https://www.naturalista.mx/observations/12403419
Iguanidae	Reptilia	Buteo plagiatus	june	2018	Oaxaca	-96.1337	15.7689	non-urban	0.0840833	https://www.naturalista.mx/observations/13726057
Colubridae	Reptilia	Buteo plagiatus	june	2018	Sonora	-110.585	28.8048	non-urban	0.135506	https://www.naturalista.mx/observations/29480377
Iguanidae	Reptilia	Buteo plagiatus	july	2018	Sinaloa	-106.441	23.2992	non-urban	1.21949	https://www.naturalista.mx/observations/15312442
Columba livia	Aves	Buteo plagiatus	november	2018	Campeche	-90.5369	19.8462	urban	0	https://www.naturalista.mx/observations/18271286
Heterogeomys	Mammalia	Buteo plagiatus	november	2018	Veracruz	-96.6613	20.1043	non-urban	7.34354	https://www.naturalista.mx/observations/52041755
Aspidoscelis	Reptilia	Buteo plagiatus	june	2019	San Luis Potosi	-99.9049	21.9673	non-urban	5.32878	https://www.naturalista.mx/observations/27784016
Iguanidae	Reptilia	Buteo plagiatus	june	2019	Chiapas	-92.0122	17.7236	urban	0	https://www.naturalista.mx/observations/34076716
Otospermophilus variegatus	Mammalia	Buteo plagiatus	september	2019	Sonora	-110.053	30.9098	non-urban	16.945	https://www.naturalista.mx/observations/34274278
Quiscalus mexicanus	Aves	Buteo plagiatus	september	2019	Colima	-104.338	19.1138	urban	0	https://www.naturalista.mx/observations/32319355
Lacertidae	Reptilia	Buteo plagiatus	december	2019	Oaxaca	-94.3325	16.5142	non-urban	2.71941	https://www.naturalista.mx/observations/37557304
Iguanidae	Reptilia	Buteo plagiatus	january	2020	Oaxaca	-96.1591	15.7787	non-urban	0.388034	https://www.naturalista.mx/observations/37429054
Anura	Amphibia	Buteo plagiatus	july	2020	Oaxaca	-94.6435	17.0522	non-urban	15.9109	https://www.naturalista.mx/observations/53541288
Rodentia	Mammalia	Buteo plagiatus	july	2020	Chiapas	-93.7467	16.130303	non-urban	3.45749	https://www.naturalista.mx/observations/54008040
Columbidae	Aves	Buteo plagiatus	november	2020	Sinaloa	-107.437	24.7882	urban	0	https://www.naturalista.mx/observations/65163341
Iguanidae	Reptilia	Buteo plagiatus	february	2021	Nayarit	-105.446394	21.6615	non-urban	2.82256	https://www.naturalista.mx/observations/70128505
Zenaida asiatica	Aves	Buteo plagiatus	march	2021	Yucatán	-87.7245	21.2127	urban	0	https://www.naturalista.mx/observations/135566167
Iguanidae	Reptilia	Buteo plagiatus	may	2021	Chiapas	-92.8705	16.5801	non-urban	3.7344	https://www.naturalista.mx/observations/78306757
Lacertidae	Reptilia	Buteo plagiatus	july	2021	Oaxaca	-96.0528	15.7941	non-urban	1.64547	https://www.naturalista.mx/observations/89585747
Didelphis virginiana	Mammalia	Buteo plagiatus	september	2021	Tamaulipas	-97.9345	22.4055	urban	0	https://www.naturalista.mx/observations/93941195
Bubulcus Ibis	Aves	Buteo plagiatus	november	2021	Yucatán	-89.63	21.1544	non-urban	1.22067	https://www.naturalista.mx/observations/102109996
Rodentia	Mammalia	Buteo plagiatus	march	2022	Nuevo León	-100.332	25.6448	urban	0	https://www.naturalista.mx/observations/114585901
Passeriformes	Aves	Buteo plagiatus	june	2022	Nuevo León	-100.247	25.6714	urban	0	https://www.naturalista.mx/observations/120913470
Anura	Amphibia	Buteo plagiatus	october	2022	Campeche	-90.4576	19.8742	non-urban	2.26853	https://www.naturalista.mx/observations/146617212
Iguanidae	Reptilia	Buteo plagiatus	march	2023	Quintana Roo	-86.8336	21.115	urban	0	https://www.naturalista.mx/observations/158466784
Rodentia	Mammalia	Buteo plagiatus	april	2023	Sinaloa	-106.292	23.1408	non-urban	4.08692	https://www.naturalista.mx/observations/158455804
Rodentia	Mammalia	Buteo plagiatus	january	2020	Nayarit	-105.25	20.8208	non-urban	0.389712	https://macaulaylibrary.org/asset/398205871
Lacertidae	Reptilia	Buteo plagiatus	april	2021	Veracruz	-95.9851	19.0332	non-urban	2.38215	https://macaulaylibrary.org/asset/330157321
Bubulcus Ibis	Aves	Buteo plagiatus	november	2021	Yucatán	-89.6326	21.1544	non-urban	1.2047	https://macaulaylibrary.org/asset/391708941
Actinopterygii	Fishes	Buteogallus anthracinus	december	2021	Guadalajara	-103.287	20.7249	non-urban	0.436013	https://macaulaylibrary.org/asset/398561551
Crab	Crustacea	Buteo plagiatus	january	2022	Oaxaca	-96.1062	15.7798	urban	0	https://macaulaylibrary.org/asset/404737711
Sciurus aureogaster	Mammalia	Buteo plagiatus	january	2022	Colima	-103.725	19.2707	non-urban	0.0876472	https://macaulaylibrary.org/asset/407101381
Columba livia	Aves	Buteo plagiatus	january	2022	Jalisco	-105.235	20.6058	urban	0	https://macaulaylibrary.org/asset/410380891
Passeriformes	Aves	Buteo plagiatus	june	2022	Nuevo León	-100.242	25.6741	urban	0	https://macaulaylibrary.org/asset/457857351
Passeriformes	Aves	Buteo plagiatus	may	2023	Campeche	-89.7552	19.3057	non-urban	12.2562	https://macaulaylibrary.org/asset/583834821
Columbidae	Aves	Astur cooperii	january	2015	Nayarit	-104.88	21.5272	urban	0	https://www.naturalista.mx/observations/1187996
Streptopelia decaocto	Aves	Astur cooperii	january	2016	Jalisco	-102.79	20.8095	non-urban	0.0301016	https://www.naturalista.mx/observations/2560376
Passeriformes	Aves	Astur cooperii	june	2016	CDMX	-99.098333	19.2906	non-urban	0.586769	https://www.naturalista.mx/observations/3425745
Turdus rufopaliatus	Aves	Astur cooperii	july	2016	Jalisco	-103.402574	20.7208	urban	0	https://www.naturalista.mx/observations/3731660
Callipepla gambelii	Aves	Astur cooperii	october	2016	Sonora	-113.473	31.555	non-urban	7.89208	https://www.naturalista.mx/observations/4478392
Columbidae	Aves	Astur cooperii	november	2016	Michoacán	-102.413	19.5194	urban	0	https://www.naturalista.mx/observations/9732067
Passeriformes	Aves	Astur cooperii	january	2017	Tamaulipas	-99.1957	23.7835	non-urban	0.490107	https://www.naturalista.mx/observations/9100532
Columba livia	Aves	Astur cooperii	february	2017	Tamaulipas	-97.8509	22.2781	urban	0	https://www.naturalista.mx/observations/8501103
Columba livia	Aves	Astur cooperii	february	2017	Nuevo León	-100.237	25.6756	urban	0	https://www.naturalista.mx/observations/5492672
Columba livia	Aves	Astur cooperii	march	2017	Coahuila	-100.526	28.6999	urban	0	https://www.naturalista.mx/observations/5419142
Rodentia	Mammalia	Astur cooperii	may	2017	Chihuahua	-106.162872	28.5757	non-urban	0.652748	https://www.naturalista.mx/observations/37954104
unidentified	Aves	Astur cooperii	january	2018	Coahuila	-101.147819	27.8656	urban	0	https://www.naturalista.mx/observations/9571378
Calidris spp	Aves	Astur cooperii	january	2018	Sonora	-110.583	27.882	non-urban	0.0463569	https://www.naturalista.mx/observations/166153652
unidentified	Aves	Astur cooperii	february	2018	Morelos	-99.2253	18.9192	urban	0	https://www.naturalista.mx/observations/21686192
unidentified	Aves	Astur cooperii	june	2018	Michoacán	-101.981	19.8417	non-urban	5.15373	https://www.naturalista.mx/observations/13735207
Canis lupus familiaris	Mammalia	Astur cooperii	june	2018	Baja California Norte	-116.599091	31.7831	urban	0	https://www.naturalista.mx/observations/15447023
Otospermophilus variegatus	Mammalia	Astur cooperii	july	2018	Michoacán	-101.180159	19.6982	non-urban	0.181246	https://www.naturalista.mx/observations/14540438
Quiscalus mexicanus	Aves	Astur cooperii	october	2018	Tamaulipas	-97.4181	25.3334	non-urban	19.7293	https://www.naturalista.mx/observations/17786010
Columbina inca	Aves	Astur cooperii	november	2018	Colima	-103.725	19.2332	urban	0	https://www.naturalista.mx/observations/18335070
unidentified	Aves	Astur cooperii	december	2018	Nuevo León	-99.56838	24.8599	urban	0	https://www.naturalista.mx/observations/20098941
unidentified	Aves	Astur cooperii	march	2019	Coahuila	-103.434	25.5389	urban	0	https://www.naturalista.mx/observations/21275574
Thryomanes bewickii	Aves	Astur cooperii	april	2019	Coahuila	-100.951	25.2867	non-urban	6.55601	https://www.naturalista.mx/observations/22861773
unidentified	Aves	Astur cooperii	may	2019	Puebla	-98.2049	19.053381	urban	0	https://www.naturalista.mx/observations/45700817
unidentified	Aves	Astur cooperii	june	2019	Guanajuato	-101.252	21.0592	non-urban	1.75323	https://www.naturalista.mx/observations/27122511
unidentified	Aves	Astur cooperii	june	2019	Guanajuato	-101.262	21.0013	non-urban	0.672746	https://www.naturalista.mx/observations/27537519
Otospermophilus variegatus	Mammalia	Astur cooperii	july	2019	Michoacán	-101.179999	19.698537	non-urban	0.170637	https://www.naturalista.mx/observations/28156772
Serpentes	Reptilia	Astur cooperii	october	2019	Veracruz	-96.4642	19.3436	non-urban	0.116904	https://www.naturalista.mx/observations/34811283
Columbina inca	Aves	Astur cooperii	october	2019	CDMX	-99.201	19.4106	non-urban	0.345476	https://www.naturalista.mx/observations/34927384
unidentified	Aves	Astur cooperii	october	2019	Baja California Norte	-116.772	31.8385	non-urban	7.62896	https://www.naturalista.mx/observations/42979239
unidentified	Aves	Astur cooperii	october	2019	Nuevo León	-100.363	25.6659	urban	0	https://www.naturalista.mx/observations/35150181
unidentified	Aves	Astur cooperii	november	2019	Jalisco	-101.991	20.9913	urban	0	https://www.naturalista.mx/observations/36039614
Columba livia	Aves	Astur cooperii	december	2019	Hidalgo	-98.8078	20.6354	non-urban	5.64495	https://www.naturalista.mx/observations/36664221
unidentified	Aves	Astur cooperii	january	2020	Chihuahua	-106.116	28.600513	non-urban	0.207378	https://www.naturalista.mx/observations/38080214
unidentified	Aves	Astur cooperii	january	2020	Chihuahua	-106.116432	28.6006	non-urban	0.217772	https://www.naturalista.mx/observations/38319583
Zenaida asiatica	Aves	Astur cooperii	february	2020	San Luis Potosí	-100.992	22.1391	urban	0	https://www.naturalista.mx/observations/39785067
Zenaida asiatica	Aves	Astur cooperii	march	2020	Durango	-104.628812	24.0529	urban	0	https://www.naturalista.mx/observations/40087121
unidentified	Aves	Astur cooperii	april	2020	Chihuahua	-105.479	28.2636	non-urban	0.0347133	https://www.naturalista.mx/observations/41181627
unidentified	Aves	Astur cooperii	june	2020	San Luis Potosí	-100.992	22.136214	urban	0	https://www.naturalista.mx/observations/52062049
Columbidae	Aves	Astur cooperii	july	2020	Chihuahua	106.164	28.5766	non-urban	0.832447	https://www.naturalista.mx/observations/57979610
Columbidae	Aves	Astur cooperii	september	2020	Zacatecas	-102.591	22.7449	urban	0	https://www.naturalista.mx/observations/60382803
unidentified	Aves	Astur cooperii	october	2020	Chihuahua	-108.366	31.1326	non-urban	25.6233	https://www.naturalista.mx/observations/63994972
Columba livia	Aves	Astur cooperii	november	2020	CDMX	-99.1591	19.4474	urban	0	https://www.naturalista.mx/observations/65950890
unidentified	Aves	Astur cooperii	january	2021	Chihuahua	-107.329	28.47704	urban	0	https://www.naturalista.mx/observations/81384498
Zenaida macroura	Aves	Astur cooperii	january	2021	Michoacán	-101.695	19.8083	non-urban	0.192545	https://www.naturalista.mx/observations/68519439
unidentified	Aves	Astur cooperii	january	2021	Nuevo León	-100.26	25.6049	urban	0	https://www.naturalista.mx/observations/71819071
unidentified	Aves	Astur cooperii	february	2021	Chihuahua	-105.479	28.2636	non-urban	0.0253028	https://www.naturalista.mx/observations/69633994
unidentified	Aves	Astur cooperii	february	2021	Coahuila	-103.433	25.5416	urban	0	https://www.naturalista.mx/observations/69791533
Columbidae	Aves	Astur cooperii	march	2021	Chiapas	-93.1297	16.7624	urban	0	https://www.naturalista.mx/observations/72242674
Columba livia	Aves	Astur cooperii	april	2021	Nuevo León	-100.273	25.6296	urban	0	https://www.naturalista.mx/observations/72664578
Melanerpes aurifons	Aves	Astur cooperii	june	2021	Zacatecas	-102.591	22.7452	urban	0	https://www.naturalista.mx/observations/83090640
unidentified	Aves	Astur cooperii	june	2021	CDMX	-99.2066	19.2434	non-urban	1.02256	https://www.naturalista.mx/observations/85570856
unidentified	Aves	Astur cooperii	july	2021	Zacatecas	-102.591	22.745	urban	0	https://www.naturalista.mx/observations/87710055
Columba livia	Aves	Astur cooperii	july	2021	San Luis Potosí	-101.039	22.1381	urban	0	https://www.naturalista.mx/observations/123114302
unidentified	Aves	Astur cooperii	august	2021	Coahuila	-101.404	26.9388	urban	0	https://www.naturalista.mx/observations/90457395
unidentified	Aves	Astur cooperii	august	2021	Michoacán	-101.156	19.6497	urban	0	https://www.naturalista.mx/observations/90611559
unidentified	Aves	Astur cooperii	september	2021	Coahuila	-101.003	25.3422	non-urban	0.307375	https://www.naturalista.mx/observations/94177235
Columba livia	Aves	Astur cooperii	september	2021	Baja California Norte	-116.925	32.5069	urban	0	https://www.naturalista.mx/observations/95092531
Columbina inca	Aves	Astur cooperii	september	2021	Guanajuato	-101.695	21.1706	urban	0	https://www.naturalista.mx/observations/95315983
unidentified	Aves	Astur cooperii	september	2021	Guanajuato	-101.683	21.1728	urban	0	https://www.naturalista.mx/observations/97089921
unidentified	Aves	Astur cooperii	october	2021	Michoacán	-101.2	19.6729	urban	0	https://www.naturalista.mx/observations/97203872
Columba livia	Aves	Astur cooperii	october	2021	Coahuila	-101.444697	26.9377	urban	0	https://www.naturalista.mx/observations/98143748
Columba livia	Aves	Astur cooperii	october	2021	Baja California Norte	-117.057743	32.5329	urban	0	https://www.naturalista.mx/observations/99294027
unidentified	Aves	Astur cooperii	october	2021	Oaxaca	-96.7143	17.0565	urban	0	https://www.naturalista.mx/observations/99845936
unidentified	Aves	Astur cooperii	november	2021	Veracruz	-96.8669	20.1907	urban	0	https://www.naturalista.mx/observations/101709348
Columba livia	Aves	Astur cooperii	december	2021	Baja California Norte	-115.518	32.6188	urban	0	https://www.naturalista.mx/observations/102896824
unidentified	Aves	Astur cooperii	december	2021	Zacatecas	-102.591	22.745	urban	0	https://www.naturalista.mx/observations/103667903
unidentified	Aves	Astur cooperii	january	2022	Nuevo León	-100.151	25.4332	urban	0	https://www.naturalista.mx/observations/105320899
Streptopelia decaocto	Aves	Astur cooperii	february	2022	Veracruz	-97.3702	20.9441	urban	0	https://www.naturalista.mx/observations/106624538
Columbina inca	Aves	Astur cooperii	february	2022	CDMX	-99.1344	19.341496	urban	0	https://www.naturalista.mx/observations/106908777
unidentified	Aves	Astur cooperii	march	2022	Jalisco	-103.517	20.606229	non-urban	1.89091	https://www.naturalista.mx/observations/108138508
Columbina inca	Aves	Astur cooperii	may	2022	Durango	-104.701	24.028	urban	0	https://www.naturalista.mx/observations/116845802
unidentified	Aves	Astur cooperii	may	2022	Estado de México	-99.020885	19.4497	non-urban	1.83916	https://www.naturalista.mx/observations/119735284
unidentified	Aves	Astur cooperii	june	2022	Estado de México	-99.1931	19.6924	non-urban	0.411283	https://www.naturalista.mx/observations/120219094
unidentified	Aves	Astur cooperii	june	2022	Chihuahua	-105.501393	28.2595	non-urban	0.757025	https://www.naturalista.mx/observations/121400907
unidentified	Aves	Astur cooperii	june	2022	Nuevo León	-100.512	27.003327	non-urban	0.665358	https://www.naturalista.mx/observations/125804727
unidentified	Aves	Astur cooperii	july	2022	San Luis Potosí	-101	22.124508	non-urban	0.724096	https://www.naturalista.mx/observations/126350279
Passer domesticus	Aves	Astur cooperii	august	2022	Chihuahua	-108.337	31.1027	non-urban	21.4063	https://www.naturalista.mx/observations/132444144
Columba livia	Aves	Astur cooperii	october	2022	Veracruz	-96.9041	19.5386	urban	0	https://www.naturalista.mx/observations/140061013
Columbidae	Aves	Astur cooperii	november	2022	Nuevo León	-100.199	25.8047	urban	0	https://www.naturalista.mx/observations/141943667
Melanerpes aurifons	Aves	Astur cooperii	december	2022	Nuevo León	-100.258	25.6666	urban	0	https://www.naturalista.mx/observations/144234799
unidentified	Aves	Astur cooperii	december	2022	Sonora	-113.477	31.2752	non-urban	1.12309	https://www.naturalista.mx/observations/144264815
unidentified	Aves	Astur cooperii	december	2022	Jalisco	-103.953	20.4922	non-urban	0.0469093	https://www.naturalista.mx/observations/148293659
Columba livia	Aves	Astur cooperii	january	2023	Nuevo León	-100.34	25.8215	urban	0	https://www.naturalista.mx/observations/146771190
unidentified	Aves	Astur cooperii	january	2023	Puebla	-98.2148	19.0678	urban	0	https://www.naturalista.mx/observations/147239550
unidentified	Aves	Astur cooperii	january	2023	Nuevo León	-100.281	25.6799	urban	0	https://www.naturalista.mx/observations/147786197
Zenaida asiatica	Aves	Astur cooperii	january	2023	Coahuila	-100.961	25.4478	urban	0	https://www.naturalista.mx/observations/147841015
unidentified	Aves	Astur cooperii	february	2023	San Luis Potosí	-100.993	22.1384	urban	0	https://www.naturalista.mx/observations/148724246
Columbidae	Aves	Astur cooperii	april	2023	Nuevo León	-100.339	25.6841	urban	0	https://www.naturalista.mx/observations/157243499
Crab	Crustacea	Buteogallus anthracinus	january	2000	Veracruz	-96.3956	19.595	non-urban	4.00507	https://www.naturalista.mx/observations/5033049
Crab	Crustacea	Buteogallus anthracinus	january	2004	Tamaulipas	-97.7814	23.4686	non-urban	28.0032	https://www.naturalista.mx/observations/176628
Actinopterygii	Fishes	Buteogallus anthracinus	december	2005	Yucatán	-88.1579	21.5965	urban	0	https://www.naturalista.mx/observations/59155864
Actinopterygii	Fishes	Buteogallus anthracinus	february	2010	Yucatán	-88.1762	21.6035	non-urban	1.84712	https://www.naturalista.mx/observations/144065020
Serpentes	Reptilia	Buteogallus anthracinus	april	2011	Yucatán	-90.3833	20.8577	non-urban	0.919931	https://www.naturalista.mx/observations/12555196
Serpentes	Reptilia	Buteogallus anthracinus	march	2012	Oaxaca	-96.4261	15.9289	non-urban	6.63041	https://www.naturalista.mx/observations/58329138
Actinopterygii	Fishes	Buteogallus anthracinus	august	2014	Yucatán	-88.1579	21.5965	urban	0	https://www.naturalista.mx/observations/4572879
Ocypode occidentalis	Crustacea	Buteogallus anthracinus	december	2014	Oaxaca	-96.5563	15.6568	non-urban	5.46885	https://www.naturalista.mx/observations/1161141
Crab	Crustacea	Buteogallus anthracinus	february	2015	Jalisco	-105.08	19.5324	non-urban	4.38166	https://www.naturalista.mx/observations/1208974
Tetraodontidae	Fishes	Buteogallus anthracinus	february	2015	Oaxaca	-96.1317	15.7392	non-urban	1.34597	https://www.naturalista.mx/observations/1232091
Actinopterygii	Fishes	Buteogallus anthracinus	july	2015	Veracruz	-97.326	20.9601	non-urban	0.053561	https://www.naturalista.mx/observations/7190823
Serpentes	Reptilia	Buteogallus anthracinus	july	2015	Jalisco	-103.612	20.6909	non-urban	2.7884	https://www.naturalista.mx/observations/1807393
Testudines	Reptilia	Buteogallus anthracinus	january	2016	Quintana Roo	-86.8159	21.1472	urban	0	https://www.naturalista.mx/observations/4021114
Actinopterygii	Fishes	Buteogallus anthracinus	february	2016	Yucatán	-88.0554	21.592	non-urban	6.39181	https://www.naturalista.mx/observations/2812785
Actinopterygii	Fishes	Buteogallus anthracinus	march	2016	Yucatán	-87.8947	21.5148	non-urban	11.9284	https://www.naturalista.mx/observations/20835849
Actinopterygii	Fishes	Buteogallus anthracinus	june	2016	Yucatán	-90.3972	20.8593	urban	0	https://www.naturalista.mx/observations/4926247
unidentified	Aves	Buteogallus anthracinus	october	2016	Nuevo León	-100.198	25.6812	urban	0	https://www.naturalista.mx/observations?order=asc&order_by=observed_on&page=6&place_id=6793&taxon_id=5233
Crab	Crustacea	Buteogallus anthracinus	november	2016	Aguascalientes	-102.372	21.7462	non-urban	3.66741	https://www.naturalista.mx/observations/25081072
Anura	Amphibia	Buteogallus anthracinus	december	2018	Jalisco	-105.238	20.6716	non-urban	0.638947	https://www.naturalista.mx/observations/83053755
Actinopterygii	Fishes	Buteogallus anthracinus	january	2017	Veracruz	-94.4514	18.1043	non-urban	0.0739289	https://www.naturalista.mx/observations/7958174
Actinopterygii	Fishes	Buteogallus anthracinus	april	2017	Veracruz	-96.1104	19.0997	urban	0	https://www.naturalista.mx/observations/5933647
Actinopterygii	Fishes	Buteogallus anthracinus	august	2017	Yucatán	-88.111	21.6095	non-urban	4.49942	https://www.naturalista.mx/observations/91090763
Crab	Crustacea	Buteogallus anthracinus	august	2017	Nayarit	-105.691	22.4666	non-urban	1.16424	https://www.naturalista.mx/observations/7651848
Actinopterygii	Fishes	Buteogallus anthracinus	december	2017	Veracruz	-97.8973	22.2241	urban	0	https://www.naturalista.mx/observations/9105366
Crab	Crustacea	Buteogallus anthracinus	december	2017	Yucatán	-89.1879	21.3534	non-urban	0.0239064	https://www.naturalista.mx/observations/39033066
Cardisoma guanhumi	Crustacea	Buteogallus anthracinus	august	2018	Quintana Roo	-86.8179	21.148	urban	0	https://www.naturalista.mx/observations/15092844
Serpentes	Reptilia	Buteogallus anthracinus	august	2018	Quintana Roo	-86.8183	21.1477	urban	0	https://www.naturalista.mx/observations/15115337
Calidris spp	Aves	Buteogallus anthracinus	october	2018	Campeche	-91.5117	18.7528	non-urban	3.53907	https://www.naturalista.mx/observations/37901415
Crab	Crustacea	Buteogallus anthracinus	january	2019	Oaxaca	-96.5792	15.6715	non-urban	7.9446	https://www.naturalista.mx/observations/19536192
Actinopterygii	Fishes	Buteogallus anthracinus	july	2019	Yucatán	-90.3555	20.906	non-urban	5.42805	https://www.naturalista.mx/observations/81204222
Crab	Crustacea	Buteogallus anthracinus	november	2019	Sinaloa	-109.05	25.6007	urban	0	https://www.naturalista.mx/observations/66396191
Actinopterygii	Fishes	Buteogallus anthracinus	january	2017	Yucatán	-90.3933	20.8509	non-urban	0.477937	https://www.naturalista.mx/observations/65532736
Actinopterygii	Fishes	Buteogallus anthracinus	january	2020	Yucatán	-88.1518	21.5576	non-urban	3.40815	https://www.naturalista.mx/observations/38112968
Serpentes	Reptilia	Buteogallus anthracinus	january	2020	Veracruz	-96.8591	19.393	non-urban	0.734398	https://www.naturalista.mx/observations/40702330
Actinopterygii	Fishes	Buteogallus anthracinus	february	2020	Yucatán	-88.1373	21.6069	non-urban	1.9865	https://www.naturalista.mx/observations/39117354
Anura	Amphibia	Buteogallus anthracinus	april	2020	Tamaulipas	-97.87	22.705	non-urban	2.01491	https://www.naturalista.mx/observations/44329669
Anura	Amphibia	Buteogallus anthracinus	may	2020	Veracruz	-96.9318	19.4214	non-urban	1.12656	https://www.naturalista.mx/observations/45425639
Anura	Amphibia	Buteogallus anthracinus	october	2020	Veracruz	-94.9413	18.5463	non-urban	8.17044	https://www.naturalista.mx/observations/69897535
Crab	Crustacea	Buteogallus anthracinus	october	2020	Veracruz	-95.1071	18.4167	non-urban	0.0302637	https://www.naturalista.mx/observations/71166595
Anura	Amphibia	Buteogallus anthracinus	november	2020	Nuevo León	-100.245	25.6721	urban	0	https://www.naturalista.mx/observations/63984919
Actinopterygii	Fishes	Buteogallus anthracinus	november	2020	Sinaloa	-107.151	24.8126	non-urban	17.7376	https://www.naturalista.mx/observations/65111140
Actinopterygii	Fishes	Buteogallus anthracinus	december	2020	Guanajuato	-103.741	25.4139	non-urban	4.2561	https://www.naturalista.mx/observations/67258768
Crab	Crustacea	Buteogallus anthracinus	november	2020	Tamaulipas	-97.7361	23.7759	non-urban	3.78175	https://www.naturalista.mx/observations/74010782
Nerodia erythrogaster	Reptilia	Buteogallus anthracinus	february	2021	Nuevo León	-100.579	26.5512	non-urban	5.25914	https://www.naturalista.mx/observations/70346812
Lacertidae	Reptilia	Buteogallus anthracinus	march	2021	México	-96.1446	15.7377	non-urban	1.67264	https://www.naturalista.mx/observations/72456746
Actinopterygii	Fishes	Buteogallus anthracinus	april	2021	Yucatán	-88.1373	21.611	non-urban	2.31442	https://www.naturalista.mx/observations/79018734
Crab	Crustacea	Buteogallus anthracinus	july	2021	Oaxaca	-96.1449	15.7371	non-urban	1.74322	https://www.naturalista.mx/observations/85433272
Crab	Crustacea	Buteogallus anthracinus	june	2021	Veracruz	-97.3407	21.0132	non-urban	0.197619	https://www.naturalista.mx/observations/121662592
Crab	Crustacea	Buteogallus anthracinus	july	2021	Oaxaca	-96.0699	15.7795	non-urban	0.287881	https://www.naturalista.mx/observations/88777250
Thamnophis proximus	Reptilia	Buteogallus anthracinus	september	2021	Nuevo León	-100.581	26.5483	non-urban	5.39376	https://www.naturalista.mx/observations/93298887
Actinopterygii	Fishes	Buteogallus anthracinus	november	2021	Veracruz	-96.075	19.0275	non-urban	1.80357	https://www.naturalista.mx/observations/103475449
Serpentes	Reptilia	Buteogallus anthracinus	december	2021	Nuevo León	-100.259	25.6662	urban	0	https://www.naturalista.mx/observations/157278669
Crab	Crustacea	Buteogallus anthracinus	december	2021	Nayarit	-105.224	21.1851	non-urban	1.42738	https://www.naturalista.mx/observations/105268730
Actinopterygii	Fishes	Buteogallus anthracinus	january	2022	Yucatán	-88.1325	21.7406	non-urban	15.895	https://www.naturalista.mx/observations/104315783
Rodentia	Mammalia	Buteogallus anthracinus	january	2022	Campeche	-90.6467	18.8123	non-urban	2.59235	https://www.naturalista.mx/observations/105132263
Actinopterygii	Fishes	Buteogallus anthracinus	january	2022	Aguascalientes	-102.372	21.7496	non-urban	3.41775	https://www.naturalista.mx/observations/128379981
Actinopterygii	Fishes	Buteogallus anthracinus	march	2022	Veracruz	-97.9707	22.2075	non-urban	1.98953	https://www.naturalista.mx/observations/109209997
Actinopterygii	Fishes	Buteogallus anthracinus	july	2022	Yucatán	-90.3859	20.8498	non-urban	1.07205	https://www.naturalista.mx/observations/127185009
Anura	Amphibia	Buteogallus anthracinus	september	2022	Durango	-103.724	25.4574	non-urban	0.403789	https://www.naturalista.mx/observations/136354823
Actinopterygii	Fishes	Buteogallus anthracinus	november	2022	Tamaulipas	-97.8276	22.3475	non-urban	2.03076	https://www.naturalista.mx/observations/147247682
Stilpnochlora	Hexapoda	Buteogallus anthracinus	december	2022	Yucatán	-90.3804	20.8575	non-urban	1.20939	https://www.naturalista.mx/observations/143649656
Crab	Crustacea	Buteogallus anthracinus	february	2023	Yucatán	-90.3941	20.86	urban	0	https://www.naturalista.mx/observations/149881507
Actinopterygii	Fishes	Buteogallus anthracinus	february	2023	Sinaloa	-108.624	26.4192	urban	0	https://www.naturalista.mx/observations/149853379
Actinopterygii	Fishes	Buteogallus anthracinus	march	2023	Campeche	-90.8439	17.8917	non-urban	0.052636	https://www.naturalista.mx/observations/150756476
Serpentes	Reptilia	Buteogallus anthracinus	april	2023	Nuevo León	-99.5754	24.8286	non-urban	0.270528	https://www.naturalista.mx/observations/153096002
Lacertidae	Reptilia	Buteogallus anthracinus	april	2023	Puebla	-97.7268	20.0023	non-urban	0.894068	https://www.naturalista.mx/observations/156958213
Actinopterygii	Fishes	Buteogallus anthracinus	july	2023	Veracruz	-96.1235	19.1131	non-urban	0.551538	https://www.naturalista.mx/observations/172266001
Procambarus clarkii	Crustacea	Buteogallus anthracinus	august	2023	Nuevo León	-100.542	26.5413	non-urban	1.4232	https://www.naturalista.mx/observations/178784961
Actinopterygii	Fishes	Buteogallus anthracinus	september	2006	Yucatán	-88.1854	21.5924	non-urban	2.52868	https://macaulaylibrary.org/asset/386104931
Actinopterygii	Fishes	Buteogallus anthracinus	december	2011	Yucatán	-88.1553	21.5861	non-urban	0.252532	https://macaulaylibrary.org/asset/130772351
Crab	Crustacea	Buteogallus anthracinus	january	2013	Nayarit	-105.43	20.8784	non-urban	0.385276	https://macaulaylibrary.org/asset/142385541
Testudines	Reptilia	Buteogallus anthracinus	january	2016	Quintana Roo	-86.8145	21.1467	urban	0	https://macaulaylibrary.org/asset/23602841
Actinopterygii	Fishes	Buteogallus anthracinus	february	2016	Yucatán	-88.1055	21.6081	non-urban	4.97708	https://macaulaylibrary.org/asset/24681671
Serpentes	Reptilia	Buteogallus anthracinus	january	2017	Chiapas	-92.9579	15.2855	non-urban	3.50577	https://macaulaylibrary.org/asset/213166441
Serpentes	Reptilia	Buteogallus anthracinus	december	2017	Nayarit	-105.324	20.964	non-urban	2.71879	https://macaulaylibrary.org/asset/79246191
Actinopterygii	Fishes	Buteogallus anthracinus	february	2018	Yucatán	-88.1055	21.6081	non-urban	4.97708	https://macaulaylibrary.org/asset/87212881
Actinopterygii	Fishes	Buteogallus anthracinus	march	2018	Yucatán	-90.3652	20.8755	non-urban	2.8322	https://macaulaylibrary.org/asset/135882601
Testudines	Reptilia	Buteogallus anthracinus	march	2018	Veracruz	-94.4671	18.1351	urban	0	https://macaulaylibrary.org/asset/123999281
Procambarus clarkii	Crustacea	Buteogallus anthracinus	december	2018	Durango	-104.723	23.9661	urban	0	https://macaulaylibrary.org/asset/135935481
Crab	Crustacea	Buteogallus anthracinus	january	2019	Nayarit	-105.481	20.8077	urban	0	https://macaulaylibrary.org/asset/185968921
Actinopterygii	Fishes	Buteogallus anthracinus	january	2019	Nayarit	-105.255	21.0366	urban	0	https://macaulaylibrary.org/asset/139011161
Actinopterygii	Fishes	Buteogallus anthracinus	june	2019	Yucatán	-88.1567	21.5965	urban	0	https://macaulaylibrary.org/asset/215103751
Actinopterygii	Fishes	Buteogallus anthracinus	october	2019	Yucatán	-88.1055	21.6081	non-urban	4.97708	https://macaulaylibrary.org/asset/183539021
Columbidae	Aves	Buteogallus anthracinus	december	2019	Jalisco	-105.236	20.6088	non-urban	0.0414959	https://macaulaylibrary.org/asset/194791271
Anura	Amphibia	Buteogallus anthracinus	may	2020	Veracruz	-96.9307	19.4199	non-urban	0.955044	https://macaulaylibrary.org/asset/232802401
Crab	Crustacea	Buteogallus anthracinus	october	2020	Veracruz	-96.3868	19.5766	non-urban	5.08003	https://macaulaylibrary.org/asset/274628391
Anura	Amphibia	Buteogallus anthracinus	october	2020	Nuevo León	-100.242	25.6741	urban	0	https://macaulaylibrary.org/asset/276307421
Crab	Crustacea	Buteogallus anthracinus	november	2020	Campeche	-92.1604	18.6197	non-urban	5.9949	https://macaulaylibrary.org/asset/289109561
Actinopterygii	Fishes	Buteogallus anthracinus	december	2020	Durango	-103.743	25.416	non-urban	3.99104	https://macaulaylibrary.org/asset/292205231
Testudines	Reptilia	Buteogallus anthracinus	november	2021	Quintana Roo	-87.392	20.2678	non-urban	0.86969	https://macaulaylibrary.org/asset/420502801
Actinopterygii	Fishes	Buteogallus anthracinus	january	2022	Yucatán	-88.1456	21.5992	non-urban	0.781292	https://macaulaylibrary.org/asset/402121931
Actinopterygii	Fishes	Buteogallus anthracinus	february	2022	Yucatán	-88.1456	21.5992	non-urban	0.781292	https://macaulaylibrary.org/asset/412993011
Actinopterygii	Fishes	Buteogallus anthracinus	october	2022	Chiapas	-92.9665	15.2882	non-urban	4.09337	https://macaulaylibrary.org/asset/501589771
Crab	Crustacea	Buteogallus anthracinus	december	2022	Veracruz	-96.311	19.3148	non-urban	0.904457	https://macaulaylibrary.org/asset/510064341
Crab	Crustacea	Buteogallus anthracinus	february	2023	Veracruz	-96.0012	19.0592	non-urban	0.271169	https://macaulaylibrary.org/asset/537794471
Actinopterygii	Fishes	Buteogallus anthracinus	february	2023	Yucatán	-88.1055	21.6081	non-urban	4.97708	https://macaulaylibrary.org/asset/560336021
Hexapoda	Hexapoda	Rupornis magnirostris	december	2010	Quintana Roo	-87.1	21.211	non-urban	11.8116	https://www.naturalista.mx/observations/11366899
Anura	Amphibia	Rupornis magnirostris	june	2012	Veracruz	-94.5073	17.9825	non-urban	0.798695	https://www.naturalista.mx/observations/3809314
Basiliscus vittatus	Reptilia	Rupornis magnirostris	may	2014	Chiapas	-92.0119	17.4999	non-urban	1.53422	https://www.naturalista.mx/observations/68124449
Colubridae	Reptilia	Rupornis magnirostris	september	2014	Veracruz	-95.0292	18.4917	non-urban	0.751726	https://www.naturalista.mx/observations/1048533
Mimus gilvus	Aves	Rupornis magnirostris	february	2015	Campeche	-91.8075	18.6505	urban	0	https://www.naturalista.mx/observations/1357863
Ctenosaura acanthura	Reptilia	Rupornis magnirostris	april	2016	Veracruz	-96.7101	20.1538	non-urban	6.55445	https://www.naturalista.mx/observations/3947434
Muridae	Mammalia	Rupornis magnirostris	september	2016	Quintana Roo	-86.8174	21.1464	urban	0	https://www.naturalista.mx/observations/4189723
Dermaptera	Hexapoda	Rupornis magnirostris	march	2017	Chiapas	-91.5851	16.9793	non-urban	0.0560349	https://www.naturalista.mx/observations/23205947
Colubridae	Reptilia	Rupornis magnirostris	april	2017	Veracruz	-98.0465	21.8462	non-urban	1.32952	https://www.naturalista.mx/observations/102343492
Iguanidae	Reptilia	Rupornis magnirostris	may	2017	Veracruz	-96.5975	19.9317	non-urban	4.13421	https://www.naturalista.mx/observations/7799881
Lacertidae	Reptilia	Rupornis magnirostris	june	2017	Oaxaca	-96.1833	15.7678	non-urban	2.07923	https://www.naturalista.mx/observations/6766502
Hexapoda	Hexapoda	Rupornis magnirostris	october	2017	Quintana Roo	-87.7645	18.6108	non-urban	11.9652	https://www.naturalista.mx/observations/8610697
unidentified	Aves	Rupornis magnirostris	february	2018	Quintana Roo	-86.8833	21.0637	non-urban	0.66586	https://www.naturalista.mx/observations/15084081
Anura	Amphibia	Rupornis magnirostris	april	2018	Veracruz	-97.3128	20.9123	non-urban	4.07975	https://www.naturalista.mx/observations/37603089
Rodentia	Mammalia	Rupornis magnirostris	november	2018	Yucatán	-87.7054	21.4644	non-urban	5.65171	https://www.naturalista.mx/observations/42542544
Colubridae	Reptilia	Rupornis magnirostris	february	2019	Tabasco	-92.3971	18.315	non-urban	16.1414	https://www.naturalista.mx/observations/27398718
Iguanidae	Reptilia	Rupornis magnirostris	march	2019	Oaxaca	-96.3199	15.834	urban	0	https://www.naturalista.mx/observations/21760043
unidentified	Reptilia	Rupornis magnirostris	july	2019	Yucatán	-89.315765	21.193	non-urban	1.09757	https://www.naturalista.mx/observations/29795933
Lagomorpha	Mammalia	Rupornis magnirostris	july	2019	Veracruz	-96.0994	19.0592	non-urban	0.358129	https://www.naturalista.mx/observations/29173653
Columba livia	Aves	Rupornis magnirostris	november	2019	Quintana Roo	-88.3082	18.5293	urban	0	https://www.naturalista.mx/observations/38511286
Serpentes	Reptilia	Rupornis magnirostris	february	2020	Veracruz	-96.4075	19.6898	non-urban	3.05741	https://www.naturalista.mx/observations/39379241
Hemiscolopendra marginata	Myriapoda	Rupornis magnirostris	march	2020	CDMX	-99.0921	19.2972	non-urban	0.184901	https://www.naturalista.mx/observations/39950196
unidentified	Aves	Rupornis magnirostris	march	2020	Yucatán	-89.4778	20.853	non-urban	0.760419	https://www.naturalista.mx/observations/40051617
unidentified	Aves	Rupornis magnirostris	march	2020	Yucatán	-89.5674	20.9963	urban	0	https://www.naturalista.mx/observations/40333444
unidentified	Aves	Rupornis magnirostris	april	2020	Yucatán	-89.6431	20.8596	urban	0	https://www.naturalista.mx/observations/45205549
Iguanidae	Reptilia	Rupornis magnirostris	april	2020	Veracruz	-96.1313	19.1291	non-urban	0.0758212	https://www.naturalista.mx/observations/43484476
Zenaida asiatica	Aves	Rupornis magnirostris	may	2020	Yucatán	-89.6197	21.0429	urban	0	https://www.naturalista.mx/observations/45161158
Aspidoscelis	Reptilia	Rupornis magnirostris	may	2020	Veracruz	-96.1799	19.2055	urban	0	https://www.naturalista.mx/observations/48734522
Rodentia	Mammalia	Rupornis magnirostris	march	2021	Tamaulipas	-97.9143	22.3888	urban	0	https://www.naturalista.mx/observations/72031694
Serpentes	Reptilia	Rupornis magnirostris	april	2021	Veracruz	-97.0135	18.8692	non-urban	1.03098	https://www.naturalista.mx/observations/72753070
Lacertidae	Reptilia	Rupornis magnirostris	april	2021	Tabasco	-92.793	18.4874	urban	0	https://www.naturalista.mx/observations/85153257
Anura	Amphibia	Rupornis magnirostris	april	2021	Chiapas	-90.9628	16.2333	non-urban	10.7649	https://www.naturalista.mx/observations/74905061
Anura	Amphibia	Rupornis magnirostris	june	2021	Oaxaca	-96.1591	15.7312	non-urban	3.16324	https://www.naturalista.mx/observations/84148129
Hexapoda	Hexapoda	Rupornis magnirostris	july	2021	Veracruz	-95.9878	19.0564	urban	0	https://www.naturalista.mx/observations/86191958
Lacertidae	Reptilia	Rupornis magnirostris	july	2021	CDMX	-99.0938	19.2864	non-urban	1.19108	https://www.naturalista.mx/observations/88062418
Ameiva	Reptilia	Rupornis magnirostris	september	2021	Veracruz	-95.9878	19.0564	urban	0	https://www.naturalista.mx/observations/93662654
Odonata	Hexapoda	Rupornis magnirostris	september	2021	Veracruz	-95.9878	19.0564	urban	0	https://www.naturalista.mx/observations/96402989
Basiliscus	Reptilia	Rupornis magnirostris	september	2021	Chiapas	-90.9024	16.2089	non-urban	5.49318	https://www.naturalista.mx/observations/97661784
Lacertidae	Reptilia	Rupornis magnirostris	january	2022	CDMX	-99.0969	19.301	urban	0	https://www.naturalista.mx/observations/105297568
Sceloporus	Reptilia	Rupornis magnirostris	april	2022	Oaxaca	-96.2207	17.8115	non-urban	0.0266894	https://www.naturalista.mx/observations/111358491
Iguanidae	Reptilia	Rupornis magnirostris	april	2022	Yucatán	-89.5195	21.101	non-urban	0.01747	https://www.naturalista.mx/observations/111788020
Serpentes	Reptilia	Rupornis magnirostris	april	2022	Veracruz	-96.1772	19.2068	urban	0	https://www.naturalista.mx/observations/115480458
Iguanidae	Reptilia	Rupornis magnirostris	may	2022	Yucatán	-89.5398	21.2254	non-urban	6.97436	https://www.naturalista.mx/observations/114359907
Iguanidae	Reptilia	Rupornis magnirostris	may	2022	Veracruz	-95.161	17.5118	non-urban	1.49155	https://www.naturalista.mx/observations/120446615
Sceloporus	Reptilia	Rupornis magnirostris	july	2022	Nuevo León	-99.7606	25.0446	non-urban	4.53005	https://www.naturalista.mx/observations/125944037
Hexapoda	Hexapoda	Rupornis magnirostris	july	2022	Chiapas	-92.0445	17.4867	non-urban	5.105	https://www.naturalista.mx/observations/126103445
Zenaida asiatica	Aves	Rupornis magnirostris	august	2022	Yucatán	-89.6549	21.0156	urban	0	https://www.naturalista.mx/observations/139593090
Serpentes	Reptilia	Rupornis magnirostris	august	2022	Yucatán	-89.6664	21.0449	urban	0	https://www.naturalista.mx/observations/132493580
Aspidoscelis	Reptilia	Rupornis magnirostris	october	2022	Oaxaca	-96.692	15.7171	non-urban	7.22609	https://www.naturalista.mx/observations/139073975
Serpentes	Reptilia	Rupornis magnirostris	november	2022	Quintana Roo	-87.0559	20.7529	non-urban	1.51275	https://www.naturalista.mx/observations/157866995
Iguanidae	Reptilia	Rupornis magnirostris	november	2022	Veracruz	-94.5565	17.9861	urban	0	https://www.naturalista.mx/observations/142577616
Lacertidae	Reptilia	Rupornis magnirostris	november	2022	Veracruz	-96.1389	19.0878	urban	0	https://www.naturalista.mx/observations/142492423
Colubridae	Reptilia	Rupornis magnirostris	january	2022	Yucatán	-89.5619	20.8124	non-urban	0.15965	https://www.naturalista.mx/observations/145870782
Lacertidae	Reptilia	Rupornis magnirostris	february	2023	Puebla	-97.7132	20.0102	non-urban	0.487384	https://www.naturalista.mx/observations/153881485
Scincidae	Reptilia	Rupornis magnirostris	march	2023	Chiapas	-92.2455	15.0213	non-urban	0.516956	https://www.naturalista.mx/observations/150240278
Iguanidae	Reptilia	Rupornis magnirostris	march	2023	Quintana Roo	-86.833	21.1121	urban	0	https://www.naturalista.mx/observations/150624895
Anguidae	Reptilia	Rupornis magnirostris	march	2023	Quintana Roo	-88.6731	18.6964	non-urban	12.0554	https://www.naturalista.mx/observations/150761552
Lacertidae	Reptilia	Rupornis magnirostris	march	2023	Campeche	-89.8085	18.1034	non-urban	36.4591	https://www.naturalista.mx/observations/156094593
unidentified	Aves	Rupornis magnirostris	march	2023	Quintana Roo	-86.8469	21.0495	urban	0	https://www.naturalista.mx/observations/152966516
Zenaida asiatica	Aves	Rupornis magnirostris	april	2023	Yucatán	-89.5969	21.0604	urban	0	https://www.naturalista.mx/observations/156528069
Iguanidae	Reptilia	Rupornis magnirostris	april	2023	Veracruz	-95.9724	19.0381	non-urban	2.31163	https://www.naturalista.mx/observations/157981461
unidentified	Aves	Rupornis magnirostris	march	2017	Quintana Roo	-87.7045	18.724	non-urban	0.119822	https://macaulaylibrary.org/asset/455951651
Iguanidae	Reptilia	Rupornis magnirostris	june	2017	Quintana Roo	-87.7317	20.4907	non-urban	0.0831839	https://macaulaylibrary.org/asset/62944551
Iguanidae	Reptilia	Rupornis magnirostris	april	2018	Yucatán	-89.5514	21.0863	urban	0	https://macaulaylibrary.org/asset/97410081
Rodentia	Mammalia	Rupornis magnirostris	july	2020	Veracruz	-95.0187	18.4903	non-urban	1.73003	https://macaulaylibrary.org/asset/306418551
Colubridae	Reptilia	Rupornis magnirostris	december	2020	Quintana Roo	-88.1369	19.8452	urban	0	https://macaulaylibrary.org/asset/291252441
Iguanidae	Reptilia	Rupornis magnirostris	february	2021	Veracruz	-96.0126	19.0519	non-urban	1.62753	https://macaulaylibrary.org/asset/311554071
Lacertidae	Reptilia	Rupornis magnirostris	april	2021	Tabasco	-92.7934	18.488	urban	0	https://macaulaylibrary.org/asset/351390111
unidentified	Aves	Rupornis magnirostris	april	2021	Tabasco	-92.7934	18.488	urban	0	https://macaulaylibrary.org/asset/352720531
Aspidoscelis	Reptilia	Rupornis magnirostris	july	2021	CDMX	-99.0963	19.292	non-urban	0.518586	https://macaulaylibrary.org/asset/356109801
Hemiptera	Hexapoda	Rupornis magnirostris	january	2022	Veracruz	-95.1295	18.5341	non-urban	5.7724	https://macaulaylibrary.org/asset/411814421
Crab	Crustacea	Rupornis magnirostris	april	2022	Veracruz	-96.8085	19.1587	non-urban	3.6627	https://macaulaylibrary.org/asset/433005471
Colubridae	Reptilia	Rupornis magnirostris	april	2022	CDMX	-99.0944	19.2918	non-urban	0.615644	https://macaulaylibrary.org/asset/440404581
Lacertidae	Reptilia	Rupornis magnirostris	november	2022	Veracruz	-96.1365	19.0847	non-urban	0.0138368	https://macaulaylibrary.org/asset/511390951
Anura	Amphibia	Rupornis magnirostris	january	2023	Yucatán	-89.5776	20.9477	urban	0	https://macaulaylibrary.org/asset/523128751
unidentified	Aves	Astur cooperii	march	2017	Baja California Norte	-116.715	31.9011	urban	0	https://macaulaylibrary.org/asset/52953511
Zenaida asiatica	Aves	Astur cooperii	july	2017	Chihuahua	-107.109	29.2611255	urban	0	https://macaulaylibrary.org/asset/62818931
unidentified	Aves	Astur cooperii	may	2018	Baja California Norte	-116.668	31.8647	urban	0	https://macaulaylibrary.org/asset/100265371
unidentified	Aves	Astur cooperii	january	2020	Coahuila	-101.009	25.4248	urban	0	https://macaulaylibrary.org/asset/202566361
unidentified	Aves	Astur cooperii	may	2020	Estado de México	-99.5275	19.9475	non-urban	0.210176	https://macaulaylibrary.org/asset/244164591
unidentified	Aves	Astur cooperii	june	2020	San Luis Potosí	-101.001	22.1267	non-urban	0.640011	https://macaulaylibrary.org/asset/245595911
unidentified	Aves	Astur cooperii	august	2020	Coahuila	-100.997	25.4042	urban	0	https://macaulaylibrary.org/asset/255085341
unidentified	Aves	Astur cooperii	february	2021	Nuevo León	-100.281	25.6802	urban	0	https://macaulaylibrary.org/asset/327208281
unidentified	Aves	Astur cooperii	march	2021	Chiapas	-93.1297	16.7626	urban	0	https://macaulaylibrary.org/asset/371634991
unidentified	Aves	Astur cooperii	april	2021	Estado de México	-99.0542	19.5922	urban	0	https://macaulaylibrary.org/asset/325923281
unidentified	Aves	Astur cooperii	september	2021	Guanajuato	-101.687	21.1792	non-urban	0.647666	https://macaulaylibrary.org/asset/375460731
unidentified	Aves	Astur cooperii	september	2021	Baja California Norte	-116.625	31.874	urban	0	https://macaulaylibrary.org/asset/371829501
Passer domesticus	Aves	Astur cooperii	october	2021	Baja California Norte	-116.625	31.874	urban	0	https://macaulaylibrary.org/asset/377099901
Columbina talpacoti	Aves	Astur cooperii	december	2021	Baja California Sur	-109.712	23.0335	urban	0	https://macaulaylibrary.org/asset/396307111
Aspidoscelis	Reptilia	Astur cooperii	october	2022	Oaxaca	-96.7683	17.0441	urban	0	https://macaulaylibrary.org/asset/493346001
unidentified	Aves	Astur cooperii	december	2022	Aguascalientes	-102.259	21.8669	urban	0	https://macaulaylibrary.org/asset/514520631
Columba livia	Aves	Astur cooperii	february	2023	Coahuila	-100.997	25.4042	urban	0	https://macaulaylibrary.org/asset/533754021
unidentified	Aves	Astur cooperii	march	2023	Oaxaca	-96.7216	17.0128	urban	0	https://macaulaylibrary.org/asset/553438981
Lacertidae	Reptilia	Buteo plagiatus	july	2023	Veracruz	-96.4491	19.2813	non-urban	0.499244	https://www.naturalista.mx/observations/175568747
unidentified	Aves	Buteo plagiatus	august	2023	Nayarit	-105.196	21.4936	non-urban	0.117193	https://www.naturalista.mx/observations/177580095
Didelphis spp	Mammalia	Buteo plagiatus	september	2023	Quintana Roo	-86.8529	21.086	urban	0	https://www.naturalista.mx/observations/183031900
Ctenosaura pectinata	Reptilia	Buteo plagiatus	november	2023	Sinaloa	-106.466	23.2681	urban	0	https://www.naturalista.mx/observations/190129092
Iguanidae	Reptilia	Buteo plagiatus	december	2023	Nayarit	-105.275	20.6858	non-urban	0.0648043	https://www.naturalista.mx/observations/195865660
Odonata	Hexapoda	Buteogallus anthracinus	september	2023	Durango	-103.747	25.4253	non-urban	2.93188	https://www.naturalista.mx/observations/184802433
Crab	Crustacea	Buteogallus anthracinus	october	2023	Nuevo León	-100.543	26.5412	non-urban	1.49702	https://www.naturalista.mx/observations/186116559
Crab	Crustacea	Buteogallus anthracinus	october	2023	Veracruz	-96.0029	19.0584	non-urban	0.470238	https://www.naturalista.mx/observations/186574606
Crab	Crustacea	Buteogallus anthracinus	november	2023	Jalisco	-104.678	19.2034	urban	0	https://www.naturalista.mx/observations/191183463
Actinopterygii	Fishes	Buteogallus anthracinus	september	2023	Yucatán	-88.0413	21.5904	non-urban	5.07701	https://www.naturalista.mx/observations/189824589
Crab	Crustacea	Buteogallus anthracinus	august	2023	Oaxaca	-96.1016	15.7784	non-urban	0.0117133	https://www.naturalista.mx/observations/180923825
Actinopterygii	Fishes	Buteogallus anthracinus	september	2023	Estado de México	-98.8381	19.5129	non-urban	1.4866	https://www.naturalista.mx/observations/183153764
Streptopelia decaocto	Aves	Buteo plagiatus	november	2023	Campeche	-90.4964	19.8655	urban	0	https://www.naturalista.mx/observations/191687021
Actinopterygii	Fishes	Buteogallus anthracinus	september	2023	Veracruz	-96.0689	19.0115	non-urban	2.42823	https://macaulaylibrary.org/asset/611324923
Crab	Crustacea	Buteogallus anthracinus	november	2023	Quintana Roo	-87.4584	20.1484	urban	0	https://macaulaylibrary.org/asset/612045595
unidentified	Aves	Astur cooperii	august	2023	Nuevo León	-100.555	26.5493	non-urban	2.97749	https://www.naturalista.mx/observations/178481490
unidentified	Aves	Astur cooperii	september	2023	Puebla	-98.2519	19.0043	urban	0	https://www.naturalista.mx/observations/181296534
unidentified	Mammalia	Astur cooperii	september	2023	Baja California Norte	-116.693	32.3583	non-urban	4.96005	https://www.naturalista.mx/observations/192394372
Streptopelia decaocto	Aves	Astur cooperii	september	2023	Coahuila	-103.432	25.5442	urban	0	https://www.naturalista.mx/observations/184792954
unidentified	Aves	Astur cooperii	september	2023	Nuevo León	-100.256	25.6984	urban	0	https://www.naturalista.mx/observations/185373869
Columbidae	Aves	Astur cooperii	october	2023	Coahuila	-103.433	25.5394	urban	0	https://www.naturalista.mx/observations/185828321
unidentified	Aves	Astur cooperii	november	2023	CDMX	-99.0755	19.4734	urban	0	https://www.naturalista.mx/observations/189675045
Columbina inca	Aves	Astur cooperii	november	2023	Coahuila	-103.433	25.541	urban	0	https://www.naturalista.mx/observations/190215325
unidentified	Aves	Astur cooperii	november	2023	Saltillo	-101.019	25.3821	urban	0	https://www.naturalista.mx/observations/193839043
unidentified	Aves	Astur cooperii	november	2023	Sinaloa	-106.42	23.262	urban	0	https://www.naturalista.mx/observations/191506500
Zenaida macroura	Aves	Astur cooperii	november	2023	Oaxaca	-97.2854	17.4501	non-urban	0.0386394	https://www.naturalista.mx/observations/191626712
unidentified	Aves	Astur cooperii	december	2023	Sinaloa	-106.415	23.2526	urban	0	https://www.naturalista.mx/observations/193715485
Quiscalus mexicanus	Aves	Astur cooperii	december	2023	Nuevo León	-100.266	25.659375	urban	0	https://www.naturalista.mx/observations/194617586
unidentified	Aves	Astur cooperii	december	2023	Tamaulipas	-97.8917	22.9563	non-urban	5.95251	https://www.naturalista.mx/observations/194333430
Columbidae	Aves	Astur cooperii	september	2023	CDMX	-99.0967	19.3099	non-urban	0.355194	https://macaulaylibrary.org/asset/609084717
unidentified	Aves	Astur cooperii	december	2023	Coahuila	-101.016	25.3816	urban	0	https://macaulaylibrary.org/asset/612021490
Rodentia	Mammalia	Rupornis magnirostris	july	2023	Veracruz	20.8198	-97.4893	non-urban	0.933122	https://www.naturalista.mx/observations/173134227
Iguanidae	Reptilia	Rupornis magnirostris	august	2023	Quintana Roo	20.5294	-87.237	non-urban	0.81663	https://www.naturalista.mx/observations/179006589
Hexapoda	Hexapoda	Rupornis magnirostris	september	2023	Quintana Roo	20.1954	-87.5126	non-urban	0.787592	https://www.naturalista.mx/observations/182365670
Quiscalus mexicanus	Aves	Rupornis magnirostris	november	2023	Quintana Roo	20.3647	-87.3327	non-urban	0.019495	https://www.naturalista.mx/observations/190240051
Rodentia	Mammalia	Rupornis magnirostris	december	2023	Veracruz	19.1873	-96.1326	non-urban	0.0822571	https://www.naturalista.mx/observations/193424201
Holcosus undulatus	Reptilia	Buteo plagiatus	february	2020	Campeche	-89.3194	17.9909	non-urban	0.631905	Nahuat-Cervera et al., 2020
Leptodeira septentrionalis	Reptilia	Rupornis magnirostris	may	2018	Quintana Roo	-88.1624	19.1548	non-urban	0.547225	Nahuat-Cervera et al., 2021
Conopsis lineatus	Reptilia	Rupornis magnirostris	september	2018	Yucatán	-89.502	21.0778	urban	0	Nahuat-Cervera et al., 2022
Thamnophis proximus	Reptilia	Rupornis magnirostris	february	2016	Campeche	-92.1493	18.2573	non-urban	4.71156	Nahuat-Cervera et al., 2023
Sceloporus poinsetti	Reptilia	Astur cooperii	not reported	1981-1982	Durango	-104.217	23.4397	non-urban	18.1607	Hiraldo et al. 1991
Sceloporus grammicus	Reptilia	Astur cooperii	not reported	1981-1982	Durango	-104.217	23.4397	non-urban	18.1607	Hiraldo et al. 1991
Sceloporus sp	Reptilia	Astur cooperii	not reported	1981-1982	Durango	-104.217	23.4397	non-urban	18.1607	Hiraldo et al. 1991
Phrynosoma orbiculare	Reptilia	Astur cooperii	not reported	1981-1982	Durango	-104.217	23.4397	non-urban	18.1607	Hiraldo et al. 1991
Barisia imbricata	Reptilia	Astur cooperii	not reported	1981-1982	Durango	-104.217	23.4397	non-urban	18.1607	Hiraldo et al. 1991
Junco phaoenotus	Aves	Astur cooperii	not reported	1981-1982	Durango	-104.217	23.4397	non-urban	18.1607	Hiraldo et al. 1991
Colaptes cafer (auratus)	Aves	Astur cooperii	not reported	1981-1982	Durango	-104.217	23.4397	non-urban	18.1607	Hiraldo et al. 1991
Melanerpes formicivorus	Aves	Astur cooperii	not reported	1981-1982	Durango	-104.217	23.4397	non-urban	18.1607	Hiraldo et al. 1991
Picidae	Aves	Astur cooperii	not reported	1981-1982	Durango	-104.217	23.4397	non-urban	18.1607	Hiraldo et al. 1991
Sialia mexicana	Aves	Astur cooperii	not reported	1981-1982	Durango	-104.217	23.4397	non-urban	18.1607	Hiraldo et al. 1991
Spinus sp	Aves	Astur cooperii	not reported	1981-1982	Durango	-104.217	23.4397	non-urban	18.1607	Hiraldo et al. 1991
Piranga sp	Aves	Astur cooperii	not reported	1981-1982	Durango	-104.217	23.4397	non-urban	18.1607	Hiraldo et al. 1991
Aphelocoma sp	Aves	Astur cooperii	not reported	1981-1982	Durango	-104.217	23.4397	non-urban	18.1607	Hiraldo et al. 1991
Pipilo erythrophtalmus	Aves	Astur cooperii	not reported	1981-1982	Durango	-104.217	23.4397	non-urban	18.1607	Hiraldo et al. 1991
Turdus migratorius	Aves	Astur cooperii	not reported	1981-1982	Durango	-104.217	23.4397	non-urban	18.1607	Hiraldo et al. 1991
Euptilotis neoxenus	Aves	Astur cooperii	not reported	1981-1982	Durango	-104.217	23.4397	non-urban	18.1607	Hiraldo et al. 1991
Sigmodon leucotis	Mammalia	Astur cooperii	not reported	1981-1982	Durango	-104.217	23.4397	non-urban	18.1607	Hiraldo et al. 1991
Neotamias bulleri	Mammalia	Astur cooperii	not reported	1981-1982	Durango	-104.217	23.4397	non-urban	18.1607	Hiraldo et al. 1991
Sylvilagus floridanus	Mammalia	Astur cooperii	not reported	1981-1982	Durango	-104.217	23.4397	non-urban	18.1607	Hiraldo et al. 1991
Moxostoma austrinum	Fishes	Buteogallus anthracinus	not reported	1981-1982	Durango	-104.217	23.4397	non-urban	18.1607	Hiraldo et al. 1991
Sceloporus jarrovi	Reptilia	Buteogallus anthracinus	not reported	1981-1982	Durango	-104.217	23.4397	non-urban	18.1607	Hiraldo et al. 1991
Sceloporus sp	Reptilia	Buteogallus anthracinus	not reported	1981-1982	Durango	-104.217	23.4397	non-urban	18.1607	Hiraldo et al. 1991
Holcosus undulatus	Reptilia	Buteo plagiatus	april	2014	Hidalgo	-98.5177	20.9611	non-urban	0.807467	Valencia-Herveth et al., 2022
Lampropeltis polyzona	Reptilia	Astur cooperii	february	2014	Nayarit	-104.826	21.418	non-urban	2.78544	Rodríguez-Canseco et al., 2015
Lampropeltis polyzona	Reptilia	Buteo plagiatus	february	2014	Nayarit	-104.826	21.418	non-urban	2.78544	Rodríguez-Canseco et al., 2015
Iguana iguana	Reptilia	Buteo plagiatus	august	2021	Chiapas	-90.9815	16.8701	non-urban	10.8593	Sánchez et al., 2023
Chiroptera	Mammalia	Astur cooperii	not reported	not reported	Campeche	-89.8187	18.5426	non-urban	9.19493	Mikula et al., 2015
Chiroptera	Mammalia	Buteo plagiatus	not reported	not reported	Campeche	-89.8187	18.5426	non-urban	9.19493	Mikula et al., 2015
Chiroptera	Mammalia	Rupornis magnirostris	not reported	not reported	Campeche	-89.8187	18.5426	non-urban	9.19493	Mikula et al., 2015
Zenaida asiatica	Aves	Buteo plagiatus	not reported	not reported	Sinaloa	-108.997	25.7901	urban	0	Ortega-Álvarez et al., 2022
Zenaida macrorura	Aves	Astur cooperii	not reported	1997	Edo. Mex.	-99.4938	19.5605	non-urban	11.7911	Ibarra-Zimbrón et al., 2001
Toxostoma	Aves	Astur cooperii	not reported	1997	Edo. Mex.	-99.4938	19.5605	non-urban	11.7911	Ibarra-Zimbrón et al., 2001
Columbina inca	Aves	Astur cooperii	not reported	1997	Edo. Mex.	-99.4938	19.5605	non-urban	11.7911	Ibarra-Zimbrón et al., 2001
Piranga ludoviciana	Aves	Astur cooperii	not reported	1997	Edo. Mex.	-99.4938	19.5605	non-urban	11.7911	Ibarra-Zimbrón et al., 2001
Turdus rufopaliatus	Aves	Astur cooperii	not reported	1997	Edo. Mex.	-99.4938	19.5605	non-urban	11.7911	Ibarra-Zimbrón et al., 2001
Turdus migratorius	Aves	Astur cooperii	not reported	1997	Edo. Mex.	-99.4938	19.5605	non-urban	11.7911	Ibarra-Zimbrón et al., 2001
Sturnella neglecta(lilianae)	Aves	Astur cooperii	not reported	1997	Edo. Mex.	-99.4938	19.5605	non-urban	11.7911	Ibarra-Zimbrón et al., 2001
Zenaida asiatica	Aves	Astur cooperii	not reported	1997	Edo. Mex.	-99.4938	19.5605	non-urban	11.7911	Ibarra-Zimbrón et al., 2001
Cyrtonyx montezumae	Aves	Astur cooperii	not reported	1997	Edo. Mex.	-99.4938	19.5605	non-urban	11.7911	Ibarra-Zimbrón et al., 2001
Cardisoma crassum	Crustacea	Buteogallus anthracinus	april	2023	Oaxaca	-96.9725	15.8182	non-urban	4.80038	Escamilla-Cortés & García-Grajales 2024
Aspidoscelis guttatus	Reptilia	Rupornis magnirostris	january	2021	Veracruz	-96.5504	19.3981	non-urban	0.707299	Bello-Sánchez et al. 2021
*unidentified	*unidentified	Rupornis magnirostris	september	2009	Yucatán	-89.975648	20.9658	no data	no data	https://www.naturalista.mx/observations/1377444
*unidentified	*unidentified	Rupornis magnirostris	december	2020	Nuevo León	-99.9074	25.3111	no data	no data	https://www.naturalista.mx/observations/67578432
*unidentified	*unidentified	Accipiter Cooperii	december	2010	Coahuila	-103.433	25.5439	no data	no data	https://www.naturalista.mx/observations/3686917
*unidentified	*unidentified	Accipiter Cooperii	may	2017	Baja California Norte	-116.598544	31.8309	no data	no data	https://www.naturalista.mx/observations/6264572
